# Supplementary material for: Exploring the Acquisition of Social Communication Skills in Children with Autism: Preliminary Findings from Applied Behavior Analysis (ABA), Parent Training, and Video Modeling
Source: MDPI journal article supplement (doi:10.3390/brainsci14020172), 2024-02-09
Supplement: s1 [file s1]

The Supplement Table S1 summarizes the content, duration, and YouTube links of the 14 videos used in the parental intervention program.

Supplement Table S1. Description, target behaviors and duration of the 14 videos.

| Video                                 | Description and Target Behaviors                                                                                                                                                                                                                  | Duration (min) | Youtube link                                                                                                                                                                                                                                                                                                                                                                                                                                                                                                                                                                                                                                                                                                                                                                                                                                                                                                                                                                                                                                                                                                              |
|---------------------------------------|---------------------------------------------------------------------------------------------------------------------------------------------------------------------------------------------------------------------------------------------------|----------------|---------------------------------------------------------------------------------------------------------------------------------------------------------------------------------------------------------------------------------------------------------------------------------------------------------------------------------------------------------------------------------------------------------------------------------------------------------------------------------------------------------------------------------------------------------------------------------------------------------------------------------------------------------------------------------------------------------------------------------------------------------------------------------------------------------------------------------------------------------------------------------------------------------------------------------------------------------------------------------------------------------------------------------------------------------------------------------------------------------------------------|
| 1. Preparing the setting.             | Parents were instructed in how to organize the therapy room (chosen place where the skills would be taught). Instructions included what could stay and what should be removed from the setting.                                                   | 3min31s        | <a href="https://www.youtube.com/watch?v=uNLhW5O8-BU&amp;list=PLbgAY2-LxYGq4EvICE_QDd-r9j_a_Nn4I&amp;index=2">https://www.youtube.com/watch?v=uNLhW5O8-BU&amp;list=PLbgAY2-LxYGq4EvICE_QDd-r9j_a_Nn4I&amp;index=2</a>                                                                                                                                                                                                                                                                                                                                                                                                                                                                                                                                                                                                                                                                                                                                                                                                                                                                                                     |
| 2. Management of disruptive behaviors | Instructions about procedures to control the child's behaviors, minimizing inappropriate behaviors (e.g.: leaving the table without permission) and maximizing appropriate behaviors (e.g.: sitting).                                             | 22min23s       | <a href="https://www.youtube.com/watch?v=l_Q5WX7QaYI&amp;list=PLbgAY2-LxYGq4EvICE_QDd-r9j_a_Nn4I&amp;index=3">https://www.youtube.com/watch?v=l_Q5WX7QaYI&amp;list=PLbgAY2-LxYGq4EvICE_QDd-r9j_a_Nn4I&amp;index=3</a><br><a href="https://www.youtube.com/watch?v=00VuPvEA7YA&amp;list=PLbgAY2-LxYGq4EvICE_QDd-r9j_a_Nn4I&amp;index=4">https://www.youtube.com/watch?v=00VuPvEA7YA&amp;list=PLbgAY2-LxYGq4EvICE_QDd-r9j_a_Nn4I&amp;index=4</a><br><a href="https://www.youtube.com/watch?v=xSKaez3aEdc&amp;list=PLbgAY2-LxYGq4EvICE_QDd-r9j_a_Nn4I&amp;index=5">https://www.youtube.com/watch?v=xSKaez3aEdc&amp;list=PLbgAY2-LxYGq4EvICE_QDd-r9j_a_Nn4I&amp;index=5</a><br><a href="https://www.youtube.com/watch?v=Suxaezt4Qgo&amp;list=PLbgAY2-LxYGq4EvICE_QDd-r9j_a_Nn4I&amp;index=6">https://www.youtube.com/watch?v=Suxaezt4Qgo&amp;list=PLbgAY2-LxYGq4EvICE_QDd-r9j_a_Nn4I&amp;index=6</a><br><a href="https://www.youtube.com/watch?v=vCw8Gf77Zp0&amp;list=PLbgAY2-LxYGq4EvICE_QDd-r9j_a_Nn4I&amp;index=7">https://www.youtube.com/watch?v=vCw8Gf77Zp0&amp;list=PLbgAY2-LxYGq4EvICE_QDd-r9j_a_Nn4I&amp;index=7</a> |
| 3. Assessment of preferred items      | Parents were taught to investigate in which objects the child had greatest interest, and which activities and foods that might function as reinforcers. Chosen items were used during the training period to reinforce target behaviors. Children | 6min07s        | <a href="https://www.youtube.com/watch?v=2cVodkpbcbOA&amp;list=PLbgAY2-LxYGq4EvICE_QDd-r9j_a_Nn4I&amp;index=8">https://www.youtube.com/watch?v=2cVodkpbcbOA&amp;list=PLbgAY2-LxYGq4EvICE_QDd-r9j_a_Nn4I&amp;index=8</a>                                                                                                                                                                                                                                                                                                                                                                                                                                                                                                                                                                                                                                                                                                                                                                                                                                                                                                   |

|                                                        |                                                                                                                                                                                                                                                                                                                                                     |         |                                                                                                                                                                                                                         |
|--------------------------------------------------------|-----------------------------------------------------------------------------------------------------------------------------------------------------------------------------------------------------------------------------------------------------------------------------------------------------------------------------------------------------|---------|-------------------------------------------------------------------------------------------------------------------------------------------------------------------------------------------------------------------------|
|                                                        | were allowed to play with the items immediately after the assessment.                                                                                                                                                                                                                                                                               |         |                                                                                                                                                                                                                         |
| 4. Errorless learning                                  | Included instructions related to the hierarchy of prompting used in which a new skill is taught to the child by preventing his/her exposure to the error. This means using a very high level of support (prompting) to teach the target behavior, and then systematically reducing this support to a lower level as the child masters the behavior. | 9min12s | <a href="https://www.youtube.com/watch?v=uVt7rRquOYo&amp;list=PLbgAY2-LxYGq4EvICE_QDd-r9j_a_Nn4I&amp;index=9">https://www.youtube.com/watch?v=uVt7rRquOYo&amp;list=PLbgAY2-LxYGq4EvICE_QDd-r9j_a_Nn4I&amp;index=9</a>   |
| 5. Eye contact level 1 – full physical prompt (FPP)    | Parents were taught on how to use the highest level of support (full physical prompt) after saying to the child “Look at me” and when to progress to the next level.                                                                                                                                                                                | 6min08s | <a href="https://www.youtube.com/watch?v=-NsPopVWug8&amp;list=PLbgAY2-LxYGq4EvICE_QDd-r9j_a_Nn4I&amp;index=10">https://www.youtube.com/watch?v=-NsPopVWug8&amp;list=PLbgAY2-LxYGq4EvICE_QDd-r9j_a_Nn4I&amp;index=10</a> |
| 6. Eye contact level 2 – partial physical prompt (PPP) | At this second level, parents were taught on how to use the partial physical prompt after saying to the child “Look at me” and when to progress to the next level.                                                                                                                                                                                  | 3min37s | <a href="https://www.youtube.com/watch?v=CmRyrh21Wi8&amp;list=PLbgAY2-LxYGq4EvICE_QDd-r9j_a_Nn4I&amp;index=11">https://www.youtube.com/watch?v=CmRyrh21Wi8&amp;list=PLbgAY2-LxYGq4EvICE_QDd-r9j_a_Nn4I&amp;index=11</a> |
| 7. Eye contact level 3 – gestural prompt (GP)          | At this third level, parents were taught on how to use the gestural prompt after saying to the child “Look at me” and when to progress to the next level.                                                                                                                                                                                           | 3min14s | <a href="https://www.youtube.com/watch?v=9psGCTliPe8&amp;list=PLbgAY2-LxYGq4EvICE_QDd-r9j_a_Nn4I&amp;index=12">https://www.youtube.com/watch?v=9psGCTliPe8&amp;list=PLbgAY2-LxYGq4EvICE_QDd-r9j_a_Nn4I&amp;index=12</a> |

|                                                       |                                                                                                                                                                                                                                               |         |                                                                                                                                                                                                                         |
|-------------------------------------------------------|-----------------------------------------------------------------------------------------------------------------------------------------------------------------------------------------------------------------------------------------------|---------|-------------------------------------------------------------------------------------------------------------------------------------------------------------------------------------------------------------------------|
| 8. Eye contact level 4 – Independence                 | At this level, parents were taught on how to stimulate the child to produce the behavior of eye contact independently.                                                                                                                        | 3min17s | <a href="https://www.youtube.com/watch?v=4xypIhVMGt8&amp;list=PLbgAY2-LxYGq4EvICE_QDd-r9j_a_Nn4I&amp;index=13">https://www.youtube.com/watch?v=4xypIhVMGt8&amp;list=PLbgAY2-LxYGq4EvICE_QDd-r9j_a_Nn4I&amp;index=13</a> |
| 9. Eye contact in a natural setting                   | Parents learned how to take advantage of daily situations to stimulate eye contact.                                                                                                                                                           | 5min12s | <a href="https://www.youtube.com/watch?v=Mx9sqb7j3mc&amp;list=PLbgAY2-LxYGq4EvICE_QDd-r9j_a_Nn4I&amp;index=14">https://www.youtube.com/watch?v=Mx9sqb7j3mc&amp;list=PLbgAY2-LxYGq4EvICE_QDd-r9j_a_Nn4I&amp;index=14</a> |
| 10. Joint attention level 1 - full physical prompt    | Parents were taught on how to use the highest level of support (full physical prompt) to stimulate joint attention after putting an object of interest to the child between themselves and the child. And when to progress to the next level. | 5min34s | <a href="https://www.youtube.com/watch?v=duJHrtRiVEg&amp;list=PLbgAY2-LxYGq4EvICE_QDd-r9j_a_Nn4I&amp;index=15">https://www.youtube.com/watch?v=duJHrtRiVEg&amp;list=PLbgAY2-LxYGq4EvICE_QDd-r9j_a_Nn4I&amp;index=15</a> |
| 11. Joint attention level 2 - partial physical prompt | Parents were taught on how to use partial physical prompt (PPP) to stimulate joint attention and when to progress to the next level.                                                                                                          | 2min47s | <a href="https://www.youtube.com/watch?v=pu1kR3sjEtc&amp;list=PLbgAY2-LxYGq4EvICE_QDd-r9j_a_Nn4I&amp;index=16">https://www.youtube.com/watch?v=pu1kR3sjEtc&amp;list=PLbgAY2-LxYGq4EvICE_QDd-r9j_a_Nn4I&amp;index=16</a> |
| 12. Joint attention level 3 - gestural prompt         | Parents were taught on how to use gestural prompt (GP) to stimulate joint attention and when to progress to the next level.                                                                                                                   | 2min55s | <a href="https://www.youtube.com/watch?v=3mve_75i49o&amp;list=PLbgAY2-LxYGq4EvICE_QDd-r9j_a_Nn4I&amp;index=17">https://www.youtube.com/watch?v=3mve_75i49o&amp;list=PLbgAY2-LxYGq4EvICE_QDd-r9j_a_Nn4I&amp;index=17</a> |
| 13. Joint attention level 4 – independence            | At this level, parents were taught on how to stimulate the child to produce the behavior of joint attention independently.                                                                                                                    | 2min52s | <a href="https://www.youtube.com/watch?v=Fz5A0tNnDd0&amp;list=PLbgAY2-LxYGq4EvICE_QDd-r9j_a_Nn4I&amp;index=18">https://www.youtube.com/watch?v=Fz5A0tNnDd0&amp;list=PLbgAY2-LxYGq4EvICE_QDd-r9j_a_Nn4I&amp;index=18</a> |
| 14. Joint attention in a natural setting              | In the final video, parents learned to stimulate joint attention in a <i>natural setting</i> , such as during play time and daily activities                                                                                                  | 6min07s | <a href="https://www.youtube.com/watch?v=wHX667TSewU&amp;list=PLbgAY2-LxYGq4EvICE_QDd-r9j_a_Nn4I&amp;index=19">https://www.youtube.com/watch?v=wHX667TSewU&amp;list=PLbgAY2-LxYGq4EvICE_QDd-r9j_a_Nn4I&amp;index=19</a> |
